# Supplementary material for: Influences of Ocean Currents on the Diets of Demersal Fish Communities in the Western North Pacific Revealed by Their Muscle Carbon and Nitrogen Isotopic Compositions
Source: Frontiers journal article supplement (doi:10.3389/fmars.2021.641282), 2021-05-05
Supplement: Table_1.xlsx [file Table_1.xlsx]

## Sheet: Full dataset
Table S1. Full dataset analyzed in this study.
Species #	Sampling year	TEAMS ID	Species	Family	Group	English name	Latitude ºN	Longitude ºE	Sampling depth (m)	δ15NBulk (‰)	δ13CBulk (‰)	Δ14CBulk (‰)	δ15NGlu (‰)	δ15NPhe (‰)	TP	Oyashio contribution (%)†	SnL (cm)	South limit (ºN, BISMaL)	North limit (ºN, BISMaL)	West limit (ºE, BISMaL)	East limit (ºE, BISMaL)	Shallowest reford (m, BISMaL)	Deepest record (m, BISMaL)	Notes
1	2012	TH2012-12b	Nezumia proxima	Macrouridae	Gadiform Fish	Short-tail grenadier	39.2739	142.232	501	13.4622	-18.0211	0.775381	27.2533	3.85519	3.63133	0.492246	3.5	27.1133	39.2133	127.239	142.397	503	1348
2	2014	TH2014-Ap14	Pterothrissus gissu	Pterothrissidae	Other Demersal Fish	Deepsea bonefish	39.3715	142.178	350	12.5071	-17.8936	24.6144	30.9457	4.63448	4.01463	0.253856	2.6	28.5367	39.9933	127.031	143.543	147	680	*
3	2013	TH2013-Ap20	Microstomus achne	Pleuronectidae	Flatfish	Slime flounder	39.2051	142.09	220	13.7053	-17.9281	11.3237	30.7607	5.3224	3.89977	0.386763	1.5	33.3017	38.3633	133.613	141.94	123	440	*
4	2013	TH2013-Ap01a	Marukawichthys ambulator	Ereuniidae	Other Demersal Fish		39.2961	142.158	300	12.4311	-17.9097	10.5401	27.5924	-0.816788	4.29069	0.394599	2.1	33.4083	40.3333	135.707	142.158	152	335	*
5	2012	TH2012-z	Sebastolobus macrochir	Sebastolobidae	Other Demersal Fish	Broadbanded thornyhead				13.8335	-19.7088		24.2151	-0.759409	3.83875		3	34.7483	42.5133	138.672	144.023	309	1213	*
5	2013	TH2013-Ap22	Sebastolobus macrochir	Sebastolobidae	Other Demersal Fish	Broadbanded thornyhead	39.2944	142.184	362	12.4653	-18.8239	-18.1294	29.0507	5.4722	3.65507	0.681294	1.9	34.7483	42.5133	138.672	144.023	309	1213	*
6	2012	TH2012-Nv03	Physiculus japonicus	Moridae	Gadiform Fish	Japanese codling	39.7941	142.27	305	14.6964	-20.7718	16.7726	27.7964	4.69166	3.59272	0.332274	4.5	34.7517	42.7183	138.547	145.027	20	561	*
6	2013	TH2013-Ap04a	Physiculus japonicus	Moridae	Gadiform Fish	Japanese codling	39.2492	142.114	243	13.7706	-18.0638	26.7941	24.9026	1.4507	3.63841	0.232059	3.5	34.7517	42.7183	138.547	145.027	20	561	*
6	2013	TH2013-Ap04b	Physiculus japonicus	Moridae	Gadiform Fish	Japanese codling	39.2492	142.114	243	11.8014	-22.6469	17.5714	25.8087	1.80048	3.71161	0.324286	2.4	34.7517	42.7183	138.547	145.027	20	561
6	2014	TH2014-Ap15	Physiculus japonicus	Moridae	Gadiform Fish	Japanese codling	39.3715	142.178	301	13.4876	-18.5368	4.07445	27.8691	2.84018	3.84591	0.459255	3.1	34.7517	42.7183	138.547	145.027	20	561	*
7	2013	TH2013-Ap11	Bothrocara zestum	Zoarcidae	Other Demersal Fish	Soft eelpout	39.1123	142.137	350	12.8969	-18.387	3.62327	29.7912	4.35783	3.89913	0.463767	3.5	34.8683	44.7433	138.627	144.341	0	1728
8	2012	TH2012-Nv05	Glyptocephalus stelleri	Pleuronectidae	Flatfish	Korean flounder				12.9948		40.0206	26.6058	2.70474	3.6975	0.0997945	2	34.8833	38.4767	129.283	141.715	125	540	*
8	2013	TH2013-Ap15	Glyptocephalus stelleri	Pleuronectidae	Flatfish	Korean flounder	39.1123	142.137	350	12.4331	-17.8102	17.6705	26.4578	2.85494	3.65828	0.323295	0.8	34.8833	38.4767	129.283	141.715	125	540	*
8	2014	TH2014-Ap10	Glyptocephalus stelleri	Pleuronectidae	Flatfish	Korean flounder	39.3636	142.201	354	11.3912	-18.276	23.6776	28.4353	5.15256	3.61614	0.263224	0.9	34.8833	38.4767	129.283	141.715	125	540
8	2014	TH2014-Ap19	Glyptocephalus stelleri	Pleuronectidae	Flatfish	Korean flounder	39.3732	142.207	348	11.8751	-17.7544	0.423844	22.6038	-2.16631	3.81185	0.495762	1.3	34.8833	38.4767	129.283	141.715	125	540
9	2012	TH2012-Nv06	Dexistes rikuzenius	Pleuronectidae	Flatfish	Rikuzen sole				11.6931	-16.927	20.6011	20.304	0.589609	3.14663	0.293989	2.3	34.9133	42.7183	138.748	145.027	93	680	*
9	2013	TH2013-Ap21	Dexistes rikuzenius	Pleuronectidae	Flatfish	Rikuzen sole	39.2051	142.09	220	11.4046	-17.8332	21.3398	24.6432	4.02777	3.26518	0.286602	1.1	34.9133	42.7183	138.748	145.027	93	680	*
9	2014	TH2014-Ap08	Dexistes rikuzenius	Pleuronectidae	Flatfish	Rikuzen sole	39.3636	142.201	401	12.4196	-18.0572	41.0725	25.1208	5.11797	3.18458	0.089275	1.1	34.9133	42.7183	138.748	145.027	93	680
9	2014	TH2014-Ap09	Dexistes rikuzenius	Pleuronectidae	Flatfish	Rikuzen sole	39.3636	142.201	354	12.5537	-17.3122	35.2885	24.9495	4.05419	3.30201	0.147115	1.4	34.9133	42.7183	138.748	145.027	93	680	*
10	2013	TH2013-Ap17	Ebinania vermiculata	Psychrolutidae	Other Demersal Fish		39.1421	142.119	300	15.0767	-21.9304	-2.2624	20.4365	-3.55243	3.70908	0.522624	5.5	34.9467	37.4883	139.217	141.853	300	1158	*
11	2012	TH2012-Nv08	Clidoderma asperrimum	Pleuronectidae	Flatfish	Roughscale sole	39.214	142.137	302	11.9161	-20.2288	21.654	24.3322	2.8586	3.3781	0.28346	4.3	35.0028	41.8247	139.225	144.084	150	1188	*
12	2012	TH2012-09	Gadus macrocephalus	Gadidae	Gadiform Fish	Pacific cod	39.2739	142.232	501	12.5382	-18.7055	14.8474	27.2604	0.0970306	4.12676	0.351526	5.2	35.7517	42.7783	132.402	142.264	160	539.8	*
12	2013	TH2013-Ap18	Gadus macrocephalus	Gadidae	Gadiform Fish	Pacific cod				11.8962	-19.0951	2.99354	24.7187	-1.14586	3.95586	0.470065	4.1	35.7517	42.7783	132.402	142.264	160	539.8	*
13	2012	TH2012-13	Hippoglossoides dubius	Pleuronectidae	Flatfish	Flathead flounder	39.2739	142.232	501	13.4337	-16.99	-2.65829	27.7533	0.941075	4.08056	0.526583	3	35.7783	44.16	132.257	144.881	201	2021	*
13	2013	TH2013-Ap14	Hippoglossoides dubius	Pleuronectidae	Flatfish	Flathead flounder	39.1123	142.137	350	12.1637	-18.5871	5.6711	26.7599	-0.322564	4.11611	0.443289	4.5	35.7783	44.16	132.257	144.881	201	2021	*
14	2012	TH2012-08a	Malacocottus zonurus	Psychrolutidae	Other Demersal Fish	Darkfin sculpin	39.2739	142.232	501	14.6365	-16.8049	-14.6673	29.23	3.32414	3.96129	0.646673	3.5	35.7783	46.9391	132.257	160.014	50	1497	*
14	2012	TH2012-08b	Malacocottus zonurus	Psychrolutidae	Other Demersal Fish	Darkfin sculpin	39.2739	142.232	501	14.2326	-17.4118	-15.5118	29.0234	2.18562	4.08392	0.655118	3	35.7783	46.9391	132.257	160.014	50	1497	*
14	2014	TH2014-Ap20	Malacocottus zonurus	Psychrolutidae	Other Demersal Fish	Darkfin sculpin	39.3732	142.207	348	15.3405	-16.4961	-4.00259	24.4235	-1.43237	3.95471	0.540026	3.7	35.7783	46.9391	132.257	160.014	50	1497
14	2014	TH2014-Fb04	Malacocottus zonurus	Psychrolutidae	Other Demersal Fish	Darkfin sculpin	39.3241	142.206	231	14.2812	-17.1345	6.70974	28.5729	4.90272	3.66713	0.432903		35.7783	46.9391	132.257	160.014	50	1497	*
15	2014	TH2014-Ap21a	Sarritor leptorhynchus	Agonidae	Other Demersal Fish	Longnose poacher	39.4143	142.161	348	12.6903	-18.6965	-8.82072	24.5321	0.454819	3.72069	0.588207	1.1	36.525	40.115	136.137	142.24	196	447
16	2012	TH2012-07	Bothrocara tanakae	Zoarcidae	Other Demersal Fish	Jelly eelpout	39.2739	142.232	501	13.7732	-18.4241	3.15214	28.9607	2.02884	4.0963	0.468479	3	36.5417	39.615	135.217	142.191	300	789	*
16	2013	TH2013-Ap02a	Bothrocara tanakae	Zoarcidae	Other Demersal Fish	Jelly eelpout	39.2961	142.158	300	12.6812		4.05752	29.8476	2.67225	4.12834	0.459425	4.2	36.5417	39.615	135.217	142.191	300	789
16	2013	TH2013-Ap12	Bothrocara tanakae	Zoarcidae	Other Demersal Fish	Jelly eelpout	39.1123	142.137	350	12.257	-18.7762	-5.33664	29.6816	2.28374	4.15762	0.553366	4.2	36.5417	39.615	135.217	142.191	300	789
17	2012	TH2012-2a	Gadus chalcogrammus	Gadidae	Gadiform Fish	Walleye pollock	39.2972	142.136		11.9721	-18.1393	8.63945	25.0787	0.0405179	3.84713	0.413605	3	36.6733	45.45	134.308	144.516	169	600	*
17	2012	TH2012-2b	Gadus chalcogrammus	Gadidae	Gadiform Fish	Walleye pollock	39.2972	142.136		11.1121	-18.5383	15.1676	24.1312	-0.796235	3.83256	0.348324	3.5	36.6733	45.45	134.308	144.516	169	600	*
17	2012	TH2012-2c	Gadus chalcogrammus	Gadidae	Gadiform Fish	Walleye pollock	39.2972	142.136		12.4882	-25.5015	0.340188	23.9675	-2.15857	3.99028	0.496598	3	36.6733	45.45	134.308	144.516	169	600	*
17	2013	TH2013-Ap19	Gadus chalcogrammus	Gadidae	Gadiform Fish	Walleye pollock				12.4024	-19.1012	-0.378196	24.7637	-1.64861	4.02794	0.503782	3.9	36.6733	45.45	134.308	144.516	169	600	*
17	2014	TH2014-Ap16	Gadus chalcogrammus	Gadidae	Gadiform Fish	Walleye pollock	39.4143	142.167	301	10.3876	-18.5457	-7.52833	24.4372	-0.711055	3.86162	0.575283	2.1	36.6733	45.45	134.308	144.516	169	600
17	2014	TH2014-Ap17	Gadus chalcogrammus	Gadidae	Gadiform Fish	Walleye pollock	39.4143	142.167	249	10.9897	-19.8566	-7.80721	25.653	-0.574875	4.00367	0.578072	2.3	36.6733	45.45	134.308	144.516	169	600
18	2012	TH2012-10	Lycodes hubbsi	Zoarcidae	Other Demersal Fish	Zoarcid	39.2739	142.232	501	13.8199	-17.2728	7.77387	28.2913	4.41808	3.69384	0.422261	4.5	36.8967	44.715	141.562	144.308	391	759	*
19	2012	TH2012-Nv02	Careproctus pellucidus	Liparidae	Other Demersal Fish	Snailfish	39.7941	142.27	305	12.4789	-18.8823	0.96406	24.9378	3.41017	3.38521	0.490359	2.1	36.9433	45.11	141.553	144.34	200	606	*
20	2013	TH2013-Ap09a	Laemonema longipes	Moridae	Gadiform Fish	Threadfin hakeling	39.1123	142.137	350	13.3802	-19.5684	-23.187	32.8809	5.3224	4.17875	0.73187	4.3	37.7017	44.17	127.068	145.022	318	656	*
20	2013	TH2013-Ap09b	Laemonema longipes	Moridae	Gadiform Fish	Threadfin hakeling	39.1123	142.137	350	11.1969	-20.7567	-41.8547	26.5894	-1.09593	4.19543	0.918547	2.3	37.7017	44.17	127.068	145.022	318	656
20	2013	TH2013-Ap09c	Laemonema longipes	Moridae	Gadiform Fish	Threadfin hakeling	39.1123	142.137	350	11.678		-22.0177	28.4832	1.7637	4.06836	0.720177	1.9	37.7017	44.17	127.068	145.022	318	656
20	2014	TH2014-Ap18	Laemonema longipes	Moridae	Gadiform Fish	Threadfin hakeling	39.3732	142.207	249	11.0506	-20.0273	-24.0182	30.5826	3.33025	4.13847	0.740182	4.9	37.7017	44.17	127.068	145.022	318	656
21	2012	TH2012-Nv09	Alcichthys elongatus	Cottidae	Other Demersal Fish	Elkhorn sculpin	39.1608	142.081	224	13.2756	-17.8199	36.5758	25.0349	-0.521763	3.91535	0.134242	4.9	38.3333	42.875	138.89	145.108	20	269	*
22	2012	TH2012-Nv01	Podothecus sachi	Agonidae	Other Demersal Fish	Snail-fin poacher	39.6921	142.242	255	13.4503	-19.4801	16.3565	26.8542	2.00183	3.82268	0.336435	4.9	40.3333	40.3333	142.158	142.158	257	269
23	2013	TH2013-Ap10	Antimora microlepis	Moridae	Gadiform Fish	Flat-nosed hake	39.1123	142.137	350	14.2666	-20.5597	2.30848	25.8245	-1.80109	4.18758	0.476915	4	-7.41167	42.6933	105.783	145.518	400	3265
24	2012	TH2012-11	Synaphobranchus kaupii	Synaphobranchidae	Other Demersal Fish	Kaup’s arrowtooth eel	39.2739	142.232	501	14.0053	-23.3527	2.33681	31.0253	0.885404	4.51841	0.476632	5.5	-34.7783	64.9833	-55.8167	144.777	250	2935	*
24	2013	TH2013-Ap08	Synaphobranchus kaupii	Synaphobranchidae	Other Demersal Fish	Kaup’s arrowtooth eel	39.1123	142.137	350	12.9495	-22.6411	-6.92334	31.8714	1.6687	4.52667	0.569233	5.8	-34.7783	64.9833	-55.8167	144.777	250	2935	*
25	2012	TH2012-12a	Coelorinchus macrochir	Macrouridae	Gadiform Fish	Longarm grenadier	39.2739	142.232	501	12.7816	-21.8447	2.76173	25.0979	-1.18425	4.01081	0.472383	1.5							*
25	2012	TH2012-Nv10	Coelorinchus macrochir	Macrouridae	Gadiform Fish	Longarm grenadier	39.1384	142.147	356			-0.635164				0.506352	4
26	2012	TH2012-Nv04	Dasycottus setiger	Psychrolutidae	Other Demersal Fish	Spinyhead sculpin	39.7941	142.27	305	14.66	-20.0412		30.1313	2.83307	4.1445		7.1	35.7367	45.2733	131.131	145.412	128	600	*
†Oyashio contribution (%) = (Δ14CBulk – Δ14CKuroshio) / (Δ14COyashio – Δ14CKuroshio) x 100, where Δ14COyashio = –50‰, Δ14CKuroshio = +50‰
*TP data reported in Ohkouchi et al. (2016)
